# Supplementary material
Source: publisher site journal article supplement (https://www.spandidos-publications.com/2221/downloadSupplementary)

Figure S1. Effect of 5-FU on HCT-15/FU and HCT-15 cells. MTT assays were used to assess the cytotoxic effects of various concentrations of 5-FU on HCT-15/FU and HCT-15 cells. The results are presented as the mean  $\pm$  standard deviation of at least three experimental repeats with three technical repeats each. 5-FU, 5-fluorouracil.

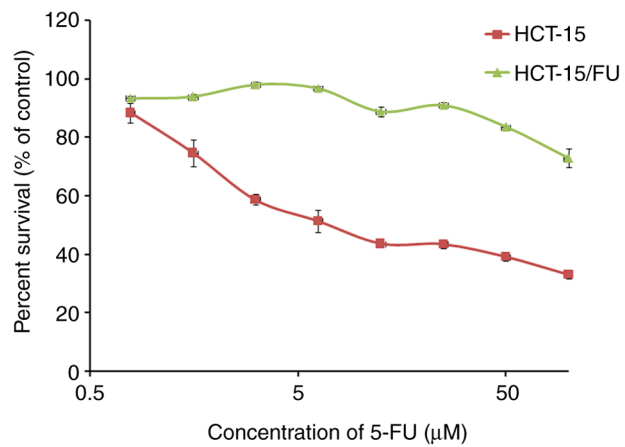

Figures S2. miRNA trend analysis to screen the expression profiles of miRNAs in HCT-15/FU cells treated with HF. miRNA trend analysis: Cluster series test analysis was performed; miRNAs were assigned to the corresponding profile according to the number of genes assigned to the profile, the number of genes expected and the enrichment P-value. (A) Profile #9. (B) Profile #11. (C) Profile #18. HF, halofuginone; miR/miRNA, microRNA.

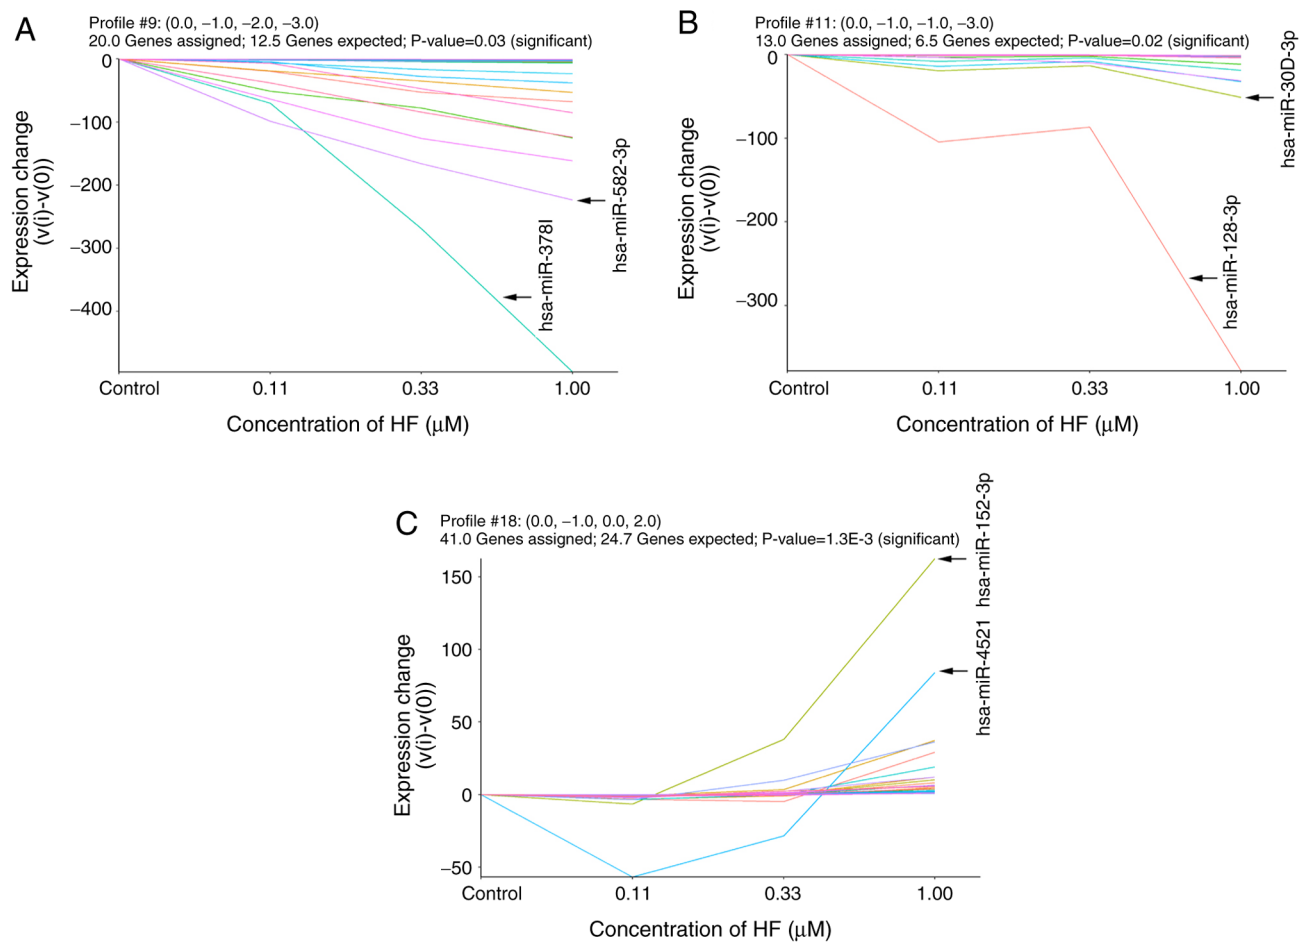

Figures S3. Representative profiles of miRNA trend analysis to screen the expression profiles of miRNAs in HCT-15/FU cells treated with HF. miRNA trend analysis: Cluster series test analysis was performed; miRNAs were assigned to the corresponding profile according to the number of genes assigned to the profile, the number of genes expected and the enrichment P-value. (A) Profile #23. (B) Profile #34. (C) Profile #38. HF, halofuginone; miR/miRNA, microRNA.

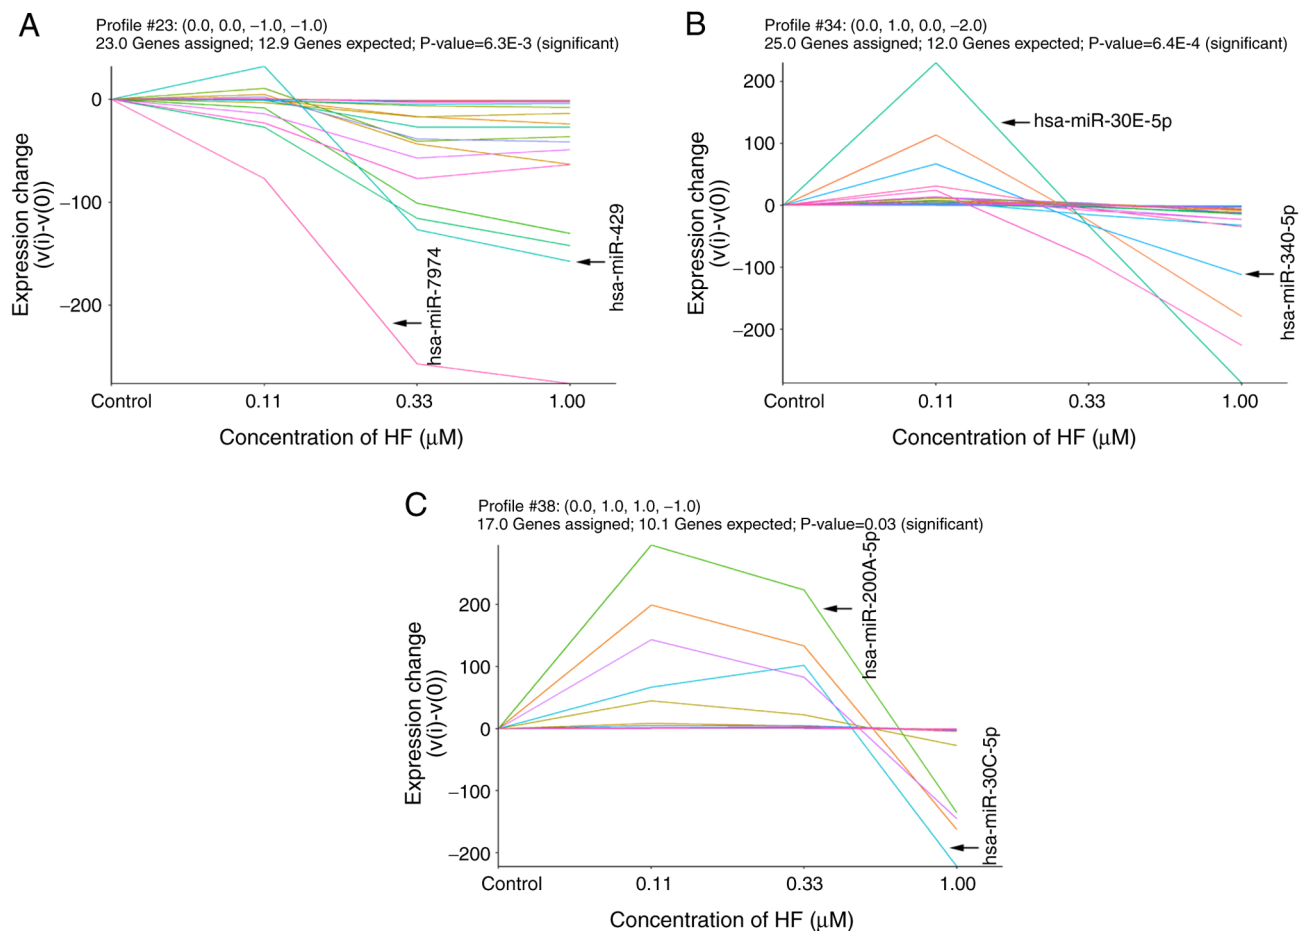

Supplement: Supplementary file 1 [file downloadSupplementary]
